# Supplementary figures and images for: Removal of pharmaceuticals by a potassium ferrate(vi) material: from practical implementation to reactivity prediction
Source: Royal Society of Chemistry journal article supplement (doi:10.1039/c7ew00038c), 2017-01-01

### Supplementary material

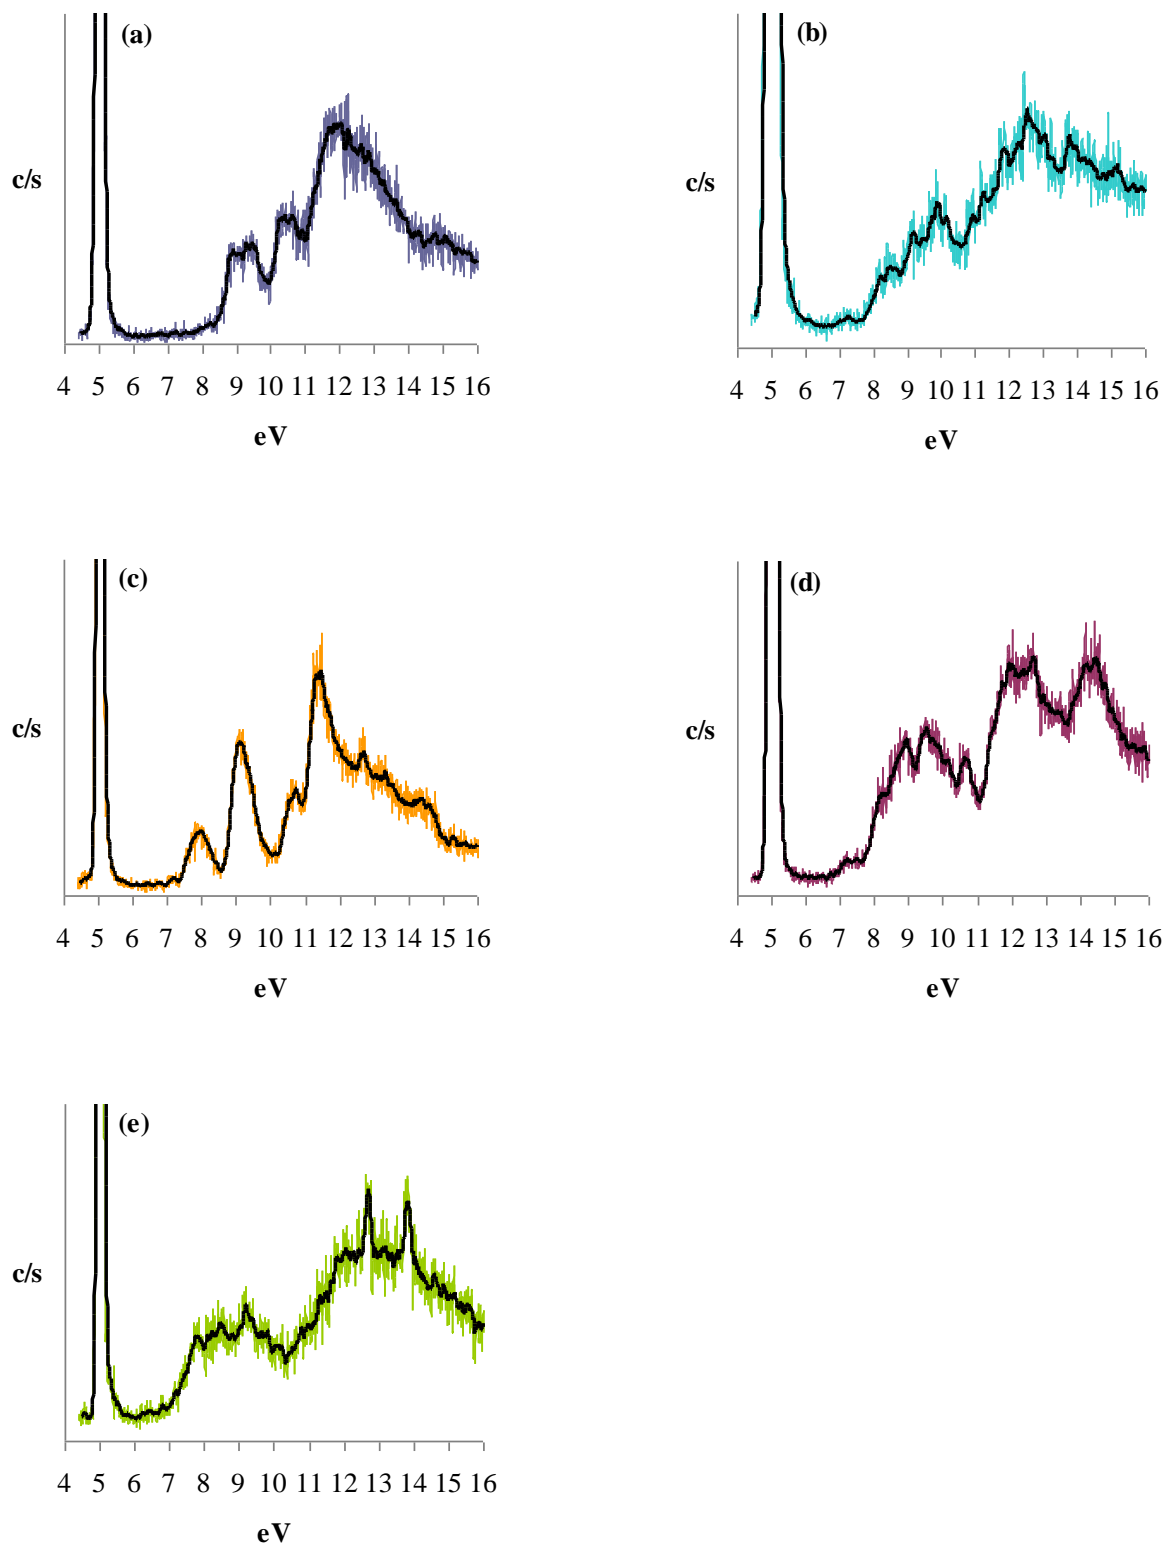

Fig.A. Photoelectronic spectra of (a) OH-IBU; (b) MET; (c) DFC; (d) CBZ; (e) CIP

Supplement: c7ew00038c1.pdf [file c7ew00038c1.pdf]
